# Supplementary material for: Specific miRNAs Change After 3 Months of GH treatment and Contribute to Explain the Growth Response After 12 Months
Source: Frontiers journal article supplement (doi:10.3389/fendo.2022.896640), 2022-06-22

### Supplementary Material

**Figure S1.** miRNA trend over time. MiRNA levels were measured in serum samples from 25 prepubertal patients with IIGHD and are expressed as  $-\Delta Ct$  where  $\Delta Ct$  is calculated as:  $Ct\ miRNA - Ct\ miR-16-5p$

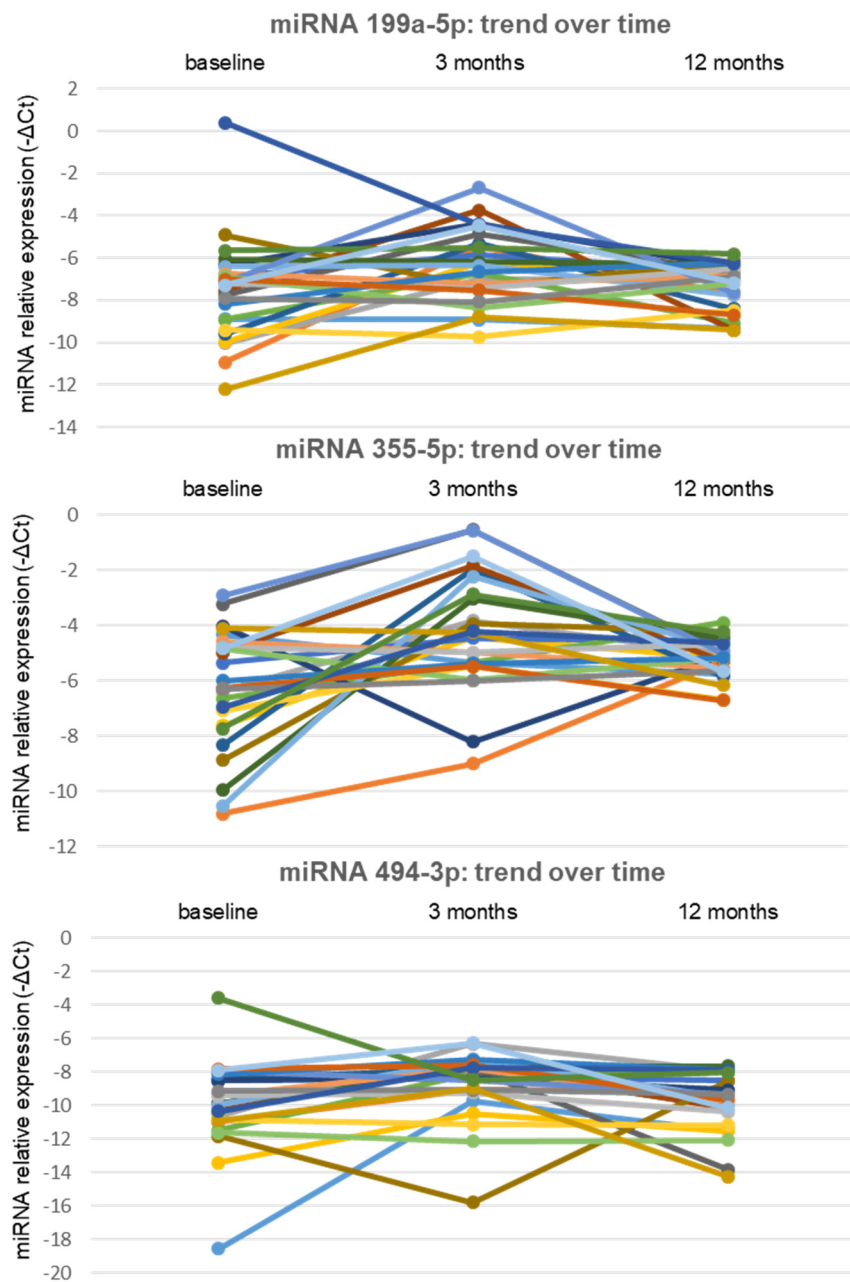

Supplement: Image_1.pdf [file Image_1.pdf]
